# Supplementary material for: Value of Biomarkers In Liver Cancer EMT Model Under Different Interventions：A Meta-Analysis
Source: Research Square preprint supplement (doi:10.21203/rs.3.rs-892562/v1), 2021-10-01
Supplement: Supplementary file 1 [file 24675df67339046eaea12bc1.xlsx]

## Sheet: Sheet1
Supplemental 3 Basic characteristics of inclusion research
Source	Intervention	Intervention type	intervention dose/ concentration	Intervention duration	Cell source	Cell culture medium	outcome index
Lu et al,2017[33]	matrine	TCM	1.5mg/ml	48h	Yanbian University	RPIM-1640	①③④
SiSi et al,2017[26]	quercetin	TCM	50μmol/L	24h	Anhui Medical University	DMEM	①③④
Zundong et al,2016[27]	Fucoidan	TCM	800μg/ml	24h	China Cell Collection Center	high glucose DMEM	①③
Hui et al,2019A[28]	modified lichongtang	TCM	800mg/L	24h	Jiangsu Provincial Hospital of Traditional Chinese Medicine	DMEM	①②③④
Cheng et al,2019[29]	Atractylon	TCM	20 μm	48h	American Type Culture Collection (ATCC)	DMEM	①②③
Fan et al,2019[30]	euphorbia factor L2	TCM	50 μm	24h	Shanghai Institute of Cell Biology	DMEM	①②③
Lee et al,2018[31]	nemopilema nomurai jellyfish venom	TCM	0.4μg/ml	Not done	ATCC	DMEM	①②③④
Xiong et al,2016[32]	8-Methoxypsoralen	TCM	50μm	24h	Cell Bank of the Chinese Academy of Sciences	NO	①②③
Lu et al,2019[33]	arctigenin	TCM	5μm	Not done	NO	RPIM-1640	①②③
Guangshu et al,2018[34]	LY294002	Western medicine	20 μmol/L	24h	Shanghai Baili Biotechnology	DMEM	①③
Li et al,2019[35]	metformin	Western medicine	50mmol/L,200μL	48h	Cell Bank of the Chinese Academy of Sciences	DMEM	①③
Zhao et al,2016[36]	somatostatin	Western medicine	400μg/ml	24h	Cell Bank of the Chinese Academy of Sciences	DMEM	①③
Hui et al,2019B[28]	5-fluorouracil	Western medicine	3.125mg/L	24h	Jiangsu Provincial Hospital of Traditional Chinese Medicine	DMEM	①②③④
Lili et al,2015A[37]	bethanechol chloride	Western medicine	Not done	Not done	ATCC	DMEM	①②
Lili et al,2015B[37]	nicotine	Western medicine	Not done	Not done	ATCC	DMEM	①②
Deng et al,2018A[38]	suberoylamilide hydroxamic acid	Western medicine	Not done	24h	Shanghai Institute of Cell Biology, Chinese Academy of Sciences	DMEM	①③
Deng et al,2018B[38]	sorafeni	Western medicine	Not done	24h	Shanghai Institute of Cell Biology, Chinese Academy of Sciences	DMEM	①③
Huiyun et al,2017[30]	epidermal growth factor	Genetic intervention	10ng/ml	48h	Fujian University of Traditional Chinese Medicine	high glucose DMEM	①②③
Jinsong et al,2019[40]	histone deacetylase 6	Genetic intervention	Not done	48h	Shanghai Institute of Life Sciences, Chinese Academy of Sciences	DMEM	①②③
Li et al,2017[41]	IQ motif containing GTPase activating proteins	Genetic intervention	Not done	48h	NO	DMEM	①②③
Li et al,2019[42]	transforming growth factor beta1 (TGF-β1)	Genetic intervention	Not done	24h	ATCC	DMEM	①②③④
Liu et al,2017[43]	TGF-β1	Genetic intervention	Not done	24h	Cell Bank of Xiangya Medical School	DMEM	①②③
Xia et al,2017[44]	Prolyl 4-hydroxylase beta polypeptide	Genetic intervention	Not done	24h	Shanghai Institute of Cell Biology, Chinese Academy of Sciences	DMEM	①②③
Xiaoni et al,2015[45]	TGF-β1	Genetic intervention	10ng/ml	24h	Beijing Institute of Hepatology.	DMEM	①③
Ximing et al,2012[46]	TGF-β1	Genetic intervention	Not done	24h	Wuhan University Cell Center	RPIM-1640	①③
Xu et al,2016[47]	Zinc-α2-glycoprotein 1	Genetic intervention	Not done	48h	No	RPMI-1640	①②
Zhu et al,2017[48]	RAS-association domain family 6	Genetic intervention	Not done	Not done	ATCC	DMEM	①②
Cheng et al,2017[49]	C-C motif chemokine receptor 4	Genetic intervention	Not done	Not done	ATCC	high glucose DMEM	①②③④
Chunmiao et al,2020[50]	TGF-β1	Genetic intervention	10ng/L	48h	Shanghai Institute of Life Sciences, Chinese Academy of Sciences	high glucose DMEM	①②④
Su et al,2019[51]	TGF-β1	Genetic intervention	10ng/mL	Not done	Shanghai Institute of Life Sciences, Chinese Academy of Sciences	DMEM medium	①④
Jiuwei et al,2019[52]	Cyclovirobuxine D	Genetic intervention	40uM	48h	Shanghai Cell Resource Center	DMEM	①②③④
Qingyu et al,2014[53]	damage-regulated autophagy modulator 1	Gene knockout/knockdown	Not done	48h	ATCC	DMEM	①③④
Xiaojie et al,2012[54]	SNAIL	Gene knockout/knockdown	Not done	Not done	ATCC	RPIM-1640	①③④
Li et al,2018[55]	XB130	Gene knockout/knockdown	Not done	Not done	Cell Bank of Shanghai Institute of Biochemistry and Cell Biology	DMEM	①②③
Pan et al,2016[56]	SEMA 4A	Gene knockout/knockdown	Not done	48h	Chinese Academy of Science Cell Bank	DMEM	①③
Qi et al,2014[57]	glypican-3	Gene knockout/knockdown	Not done	72h	Cell Collection of the Chinese Academy of Sciences	DMEM	①④
Wu et al,2014[58]	CK2 alpha	Gene knockout/knockdown	Not done	Not done	ATCC	RPIM-1640	①③④
Zhang et al,2019[59]	trophoblast cell surface antigen 2	Gene knockout/knockdown	Not done	24h	Procell Life Science & Technology Co., Ltd.	DMEM	①②③
Zhang et al,2019[60]	Beta-1,3-glucuronyltransferase3	Gene knockout/knockdown	Not done	24h	Type Culture Collection of the Chinese Academy of Sciences	DMEM	①②④
Sisi et al,2017[26]	CoCI2	Hypoxia	100umol/L	24h	The First Affiliated Hospital of Anhui Medical University	DMEM	①③④
Huang et al,2016[61]	CoCI2	Hypoxia	200 μm	Not done	No	DMEM	①③④
Jianwei et al,2010[62]	Hypoxia	Hypoxia	Not done	48h	Tongji Medical College	DMEM	①③
Jiao et al,2012[63]	Hypoxia	Hypoxia	1% O2, 5% CO2 and 94% N2	Not done	ATCC	high glucose DMEM	①②③
Ximing et al,2012[46]	Hypoxia	Hypoxia	1% O2, 5% CO2, 37 ℃	72h	Wuhan University Cell Center	RPIM-1640	①③
Lili et al, 2015C[37]	acetylcholine	The other	Not done	Not done	ATCC	DMEM	①②
Lili et al,2015D[37]	substance P	The other	Not done	Not done	ATCC	DMEM	①②
Fu et al,2015[64]	IL-8	The other	Not done	24h	Institute of Biochemistry and Cell Biology, Chinese Academy of Sciences, Shanghai, China	RPIM-1640	①②④
Meng et al, 2015[65]	hepatocyte growth factor	The other	Not done	48h	The Chinese Academy of Sciences	DMEM	①③
Liping et al,2018[66]	miR-19a	Overexpression of ncRNA	Not done	48h	Affiliated Hospital of Chengde Medical College	DMEM	①②④
Li et al,2015[67]	miR-503	Overexpression of ncRNA	Not done	48h	ATCC	DMEM	①②③
Wu et al,2015[68]	miR-16	Overexpression of ncRNA	Not done	Not done	the Cell Bank of the Chinese Academy of Sciences	DMEM	①③④
Zhang et al,2014[69]	MiR-424-5p	Overexpression of ncRNA	Not done	Not done	No	RPIM-1640	①②③④
Zhou et al,2017[70]	MiR-199b-5p	Overexpression of ncRNA	Not done	Not done	Typical Training Content Preservation Committee Cell Bank, Chinese Academy of Sciences	DMEM	①②④
Zhou et al,2016[71]	MiR-98	Overexpression of ncRNA	Not done	Not done	Chinese Academy of Sciences	DMEM	①②③
Fan et al,2018[72]	long non-coding RNA- n335586	Overexpression of ncRNA	Not done	Not done	No	DMEM	①③④
Zhu et al,2019[73]	long non-coding RNA-CRNDE	Overexpression of ncRNA	Not done	48h	Chinese Academy of Sciences Cell Bank	high glucose DMEM	①②③
Wang et al,2018[74]	long non-coding RNA-FEZF1-AS1	Overexpression of ncRNA	Not done	48h	ATCC	DMEM	①②③
Zhao et al,2016[75]	miR-27a-3p	ncRNA silence	Not done	Not done	ATCC	DMEM	①②③
Jinlan et al,2016[76]	long non-coding RNA-PTTG3P	ncRNA silence	Not done	Not done	Shanghai Institute of Cell Biology, Chinese Academy of Science	high glucose DMEM	①②④
Han et al,2019[77]	long non-coding RNA-DUXAP10	ncRNA silence	Not done	48h	Cell Biology of Shanghai Institute	DMEM	①②③
Huang et al,2018[78]	long non-coding RNA-PTTG3P	ncRNA silence	Not done	Not done	Cell Bank of Type Culture Collection	DMEM	①②④
Yang et al,2018[79]	long non-coding RNA-AK021443	ncRNA silence	Not done	Not done	cell bank of Shanghai Institute for Biological Sciences	high glucose DMEM	①②③④
Yu et al,2019[80]	long non-coding RNA-MALAT1	ncRNA silence	Not done	Not done	ATCC	DMEM	①③
